# Supplementary material for: EMT activates exocytotic Rabs to coordinate invasion and immunosuppression in lung cancer
Source: PubMed Central journal article supplement — Proc Natl Acad Sci U S A. 2023 Jul 5;120(28):e2220276120. doi: 10.1073/pnas.2220276120 (PMC10334751; doi:10.1073/pnas.2220276120), 2023-07-05
Supplement: pnas.2220276120.sapp.pdf [file pnas.2220276120.sapp.pdf]

## **Supporting Information for**

## **EMT activates exocytotic Rabs to coordinate invasion and immunosuppression in lung cancer**

Guan-Yu Xiao, Xiaochao Tan, Bertha L. Rodriguez, Don L. Gibbons, Shike Wang, Chao Wu, Xin Liu, Jiang Yu, Mayra E. Vasquez, Hai T. Tran, Jun Xu, William K. Russell, Cara Haymaker, Younghee Lee, Jianjun Zhang, Luisa Solis, Ignacio I. Wistuba, Jonathan M. Kurie

Guan-Yu Xiao, Jonathan M. Kurie

Email: [Guan-Yu.Xiao@uky.edu](mailto:Guan-Yu.Xiao@uky.edu), [JKurie@mdanderson.org](mailto:JKurie@mdanderson.org)

### **This PDF file includes:**

Figures S1 to S8

Tables S1 to S3



**Fig. S1. ZEB1 activates exocytotic Rabs.** (A) Q-PCR analysis of Rab family member mRNA levels in 393P\_vector cells (Vec) and 393P\_ZEB1 cells (ZEB1) (n=6 replicates per condition). (B) Western blot (WB) analysis of Rab6A and Rab8A levels in the indicated transfectants.  $\beta$ -actin loading control. Relative densitometric values indicated. (C) WB analysis of Rab6A and Rab8A in cells transfected with miR-148a mimics or non-coding control (NC). (D, E) Luciferase activities in H1299 cells transiently co-transfected with pre-miR-148a and human Rab6A 3'UTR (D) or Rab8A 3'UTR (E) reporters containing wild-type (WT) or mutant 3'-UTRs lacking predicted miR-148a binding sites (MT). Empty reporters (Vec). Results represent means  $\pm$  SEM (n= 6 replicates per condition). (F) Alignment of Rab6A 3'UTR sequences (top seq-1) and indicated clone sequences (anti-parallel, bottom seq-2). The sgRNA sequences are in yellow. miR148a binding site is in red.

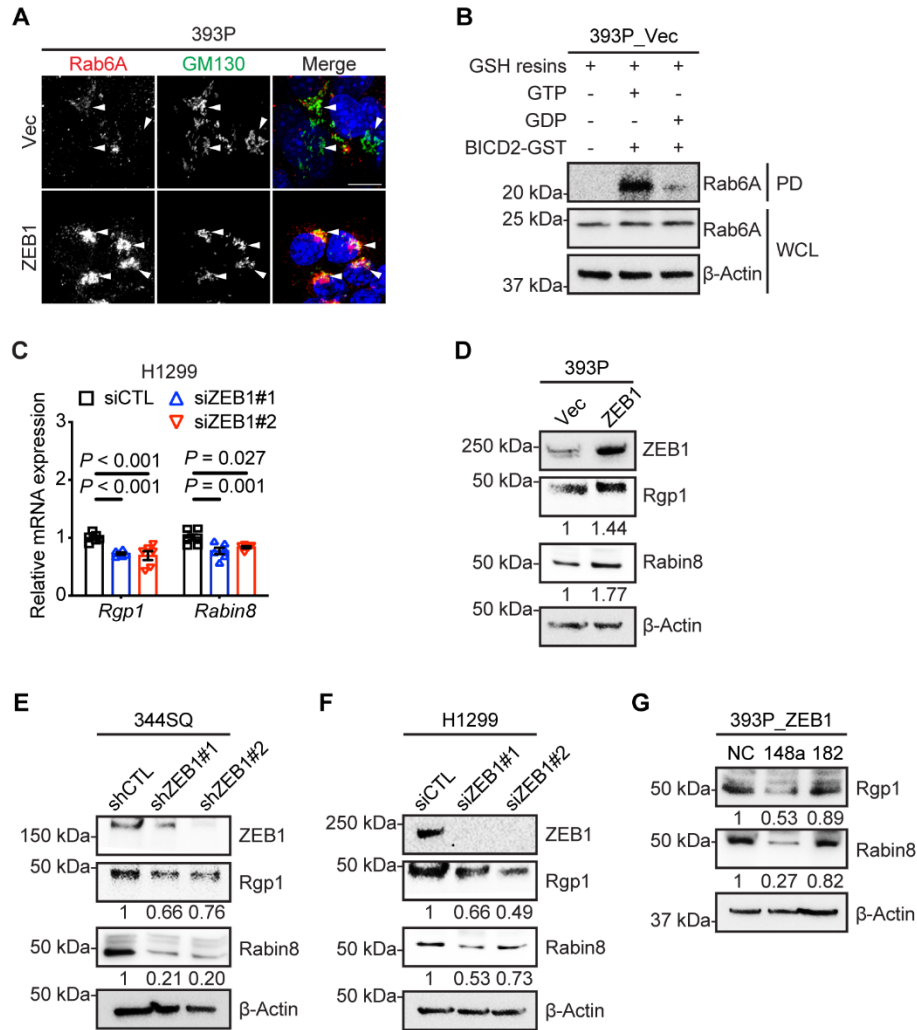

**Fig. S2. ZEB1 activates exocytotic Rabs and their GEFs.** (A) Confocal micrographs of cells co-stained with anti-Rab6A (red) and -GM130 (green) antibodies. DAPI (blue). Scale bar: 10  $\mu$ m. (B) Specificity of assays to detect GTP-bound Rab6A in cell lysates. 393P\_vector cell lysates were spiked with (200  $\mu$ M) GTP or GDP and GST-tagged effector protein (BICD2) or GSH resins alone. Lysates were subjected to GST pull-down (PD) and WB analysis was carried out on GST-associated proteins or whole cell lysates (WCL) to detect Rab6A. (C) Q-PCR analysis of *Rgp1* and *Rabin8* mRNA levels (n=6 replicates per condition). (D-F) WB analysis of *Rgp1* and *Rabin8* levels in ectopic ZEB1-expressing 393P cells (D), ZEB1-deficient or -replete 344SQ cells (E), and ZEB1-deficient or -replete H1299 cells (F). Empty vector (Vec).  $\beta$ -actin loading control. Relative densitometric values indicated. (G) WB analysis of *Rgp1* and *Rabin8* levels in miR mimic-transfected 393P\_ZEB1 cells. miR-148a (148a). miR-182 (182). non-coding control (NC). Relative densitometric values indicated.

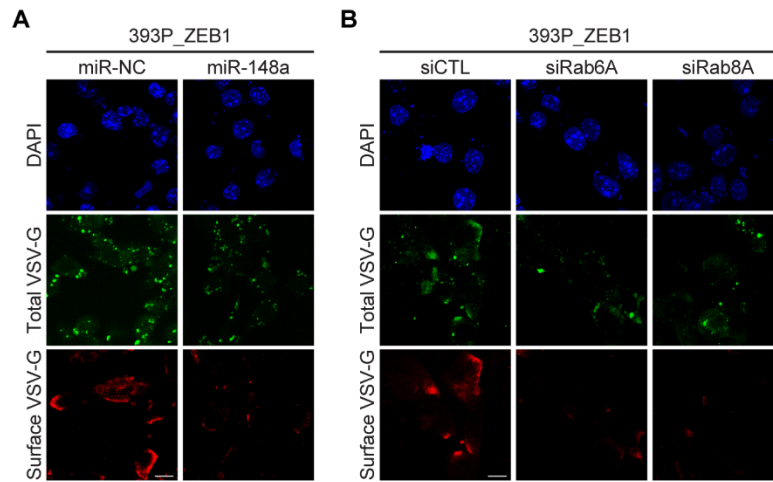

**Fig. S3. ZEB1 accelerates exocytotic trafficking by relieving Rab6A and Rab8A from miR-148a-dependent silencing.** (A, B) Confocal micrographs of EGFP-tsVSV-G-transfected cells taken 1 h after transfer to permissive temperature. Scale bar, 10  $\mu$ m.

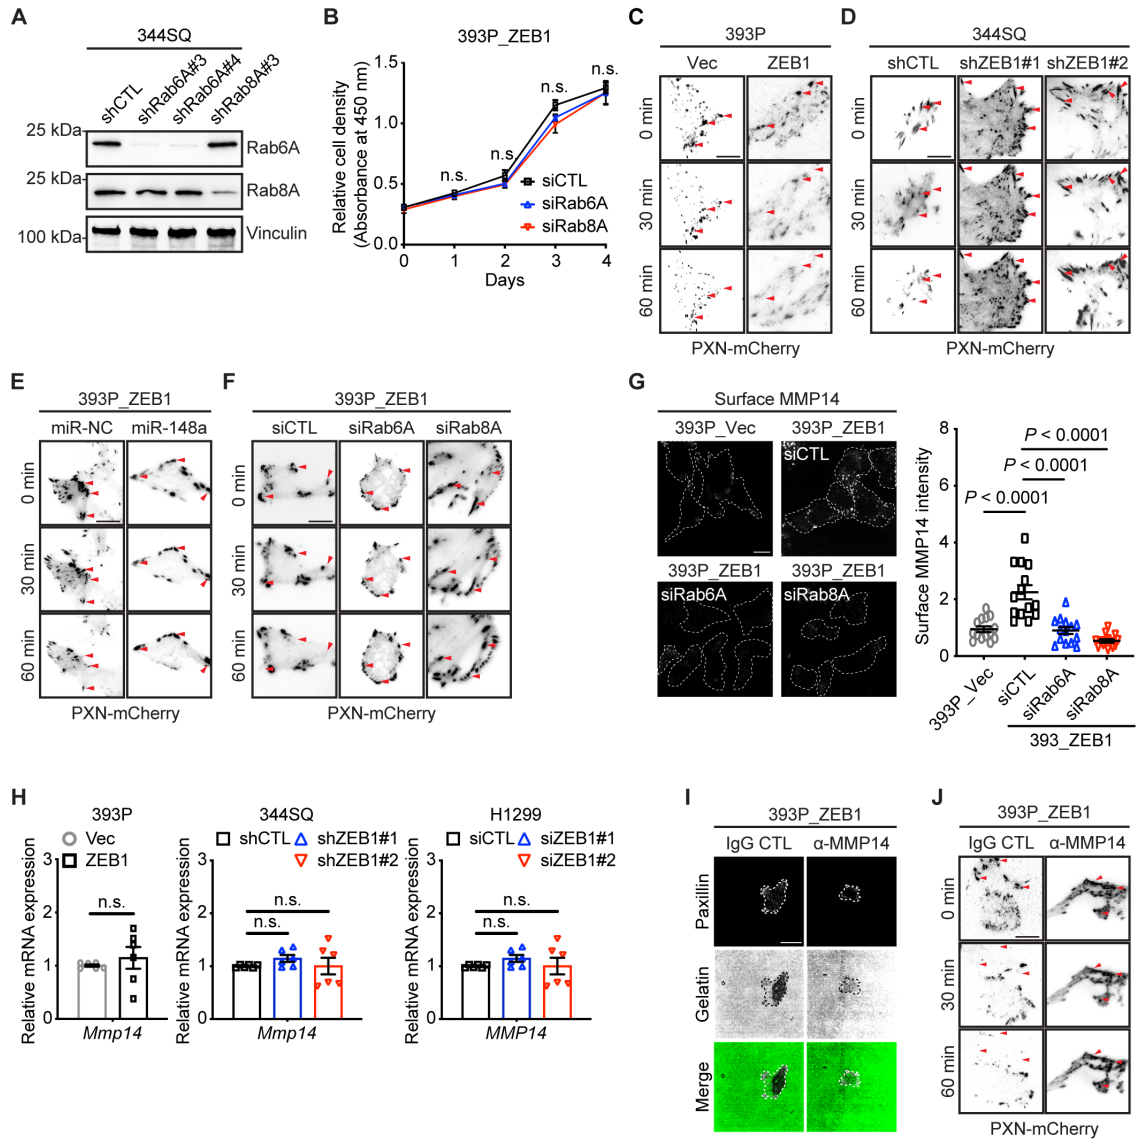

**Fig. S4. ZEB1 accelerates FA disassembly by relieving Rab6A and Rab8A from miR-148a-dependent silencing.** (A) WB analysis of Rab6A and Rab8A levels in 344SQ cells transfected with control (shCTL), Rab6A (shRab6A) or Rab8A (shRab8A) shRNAs. Vinculin loading control. (B) Relative cell density in monolayer culture (n = 8 samples per condition). *P* values were determined using 2-tailed Student's *t* test. (C-F) Representative TIRF micrographs of KP cells subjected to ectopic ZEB1 expression (C), shRNA-mediated ZEB1 depletion (D), ectopic miR-148a expression (E), or siRNA-mediated Rab6A or Rab8A depletion (F). Disassembling FAs detected by paxillin-mCherry (arrowheads). Scale bars, 10  $\mu$ m. (G) Confocal micrographs of non-permeabilized cells stained with  $\alpha$ -MMP14 antibody to detect surface MMP14. Scale bar: 10  $\mu$ m. Fluorescence values per cell (dot) normalized to 393P\_Vec (scatter plot). (H) Q-PCR analysis of *MMP14* mRNA levels in the indicated cells (n=6 replicates per condition). Control shRNA or siRNA sequences (CTL). (I) Confocal micrographs of cells seeded on Oregon Green-488-gelatin, treated for 16 h with IgG or anti-MMP14 neutralizing antibody, and imaged 90 min later. (J) Representative TIRF micrographs of paxillin-mCherry-transfected cells, treated for 16 h with IgG or anti-MMP14 neutralizing antibody. Disassembling FAs (arrowheads). Scale bars, 10  $\mu$ m.

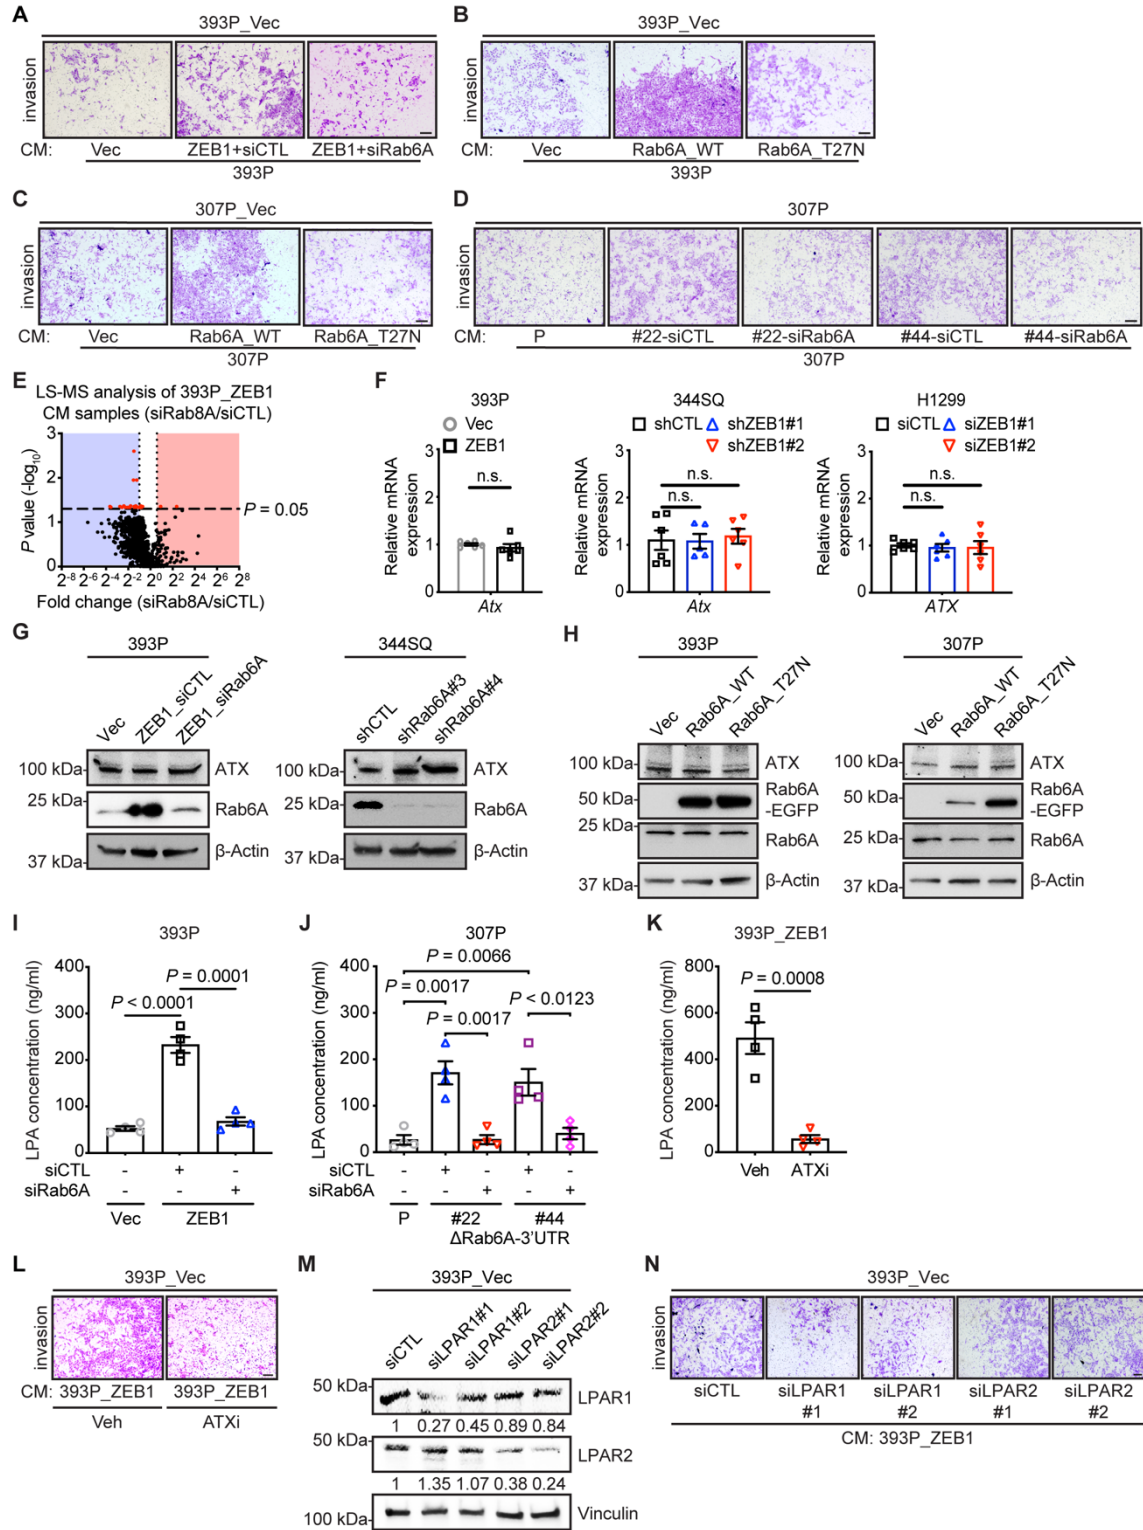



**Fig. S5. The ZEB1/mR-148a/Rab6A axis promotes cancer cell invasion via a ATX/LPA-dependent pathway.** (A-D) Bright field micrographs of cells that invaded through Matrigel-coated filters in Boyden chambers. Scale bar, 200  $\mu$ m. Upper chambers contained CM from the indicated cells. (E) Volcano plot of proteins identified by LC-MS analysis of CM samples. *P* values (Y axis) and fold-change (X axis). Proteins at significantly different concentrations (red dots, *P* < 0.05) in Rab8A-deficient and -replete 393P\_ZEB1 cells. (F) Q-PCR analysis of *ATX* mRNA levels in the indicated cells (n=6 replicates per condition). Control shRNA or siRNA sequences (CTL). (G) WB analysis shows that *ATX* levels in whole cell lysates are not altered by ectopic ZEB1 expression or Rab6A depletion.  $\beta$ -actin loading control. (H) WB analysis shows that *ATX* levels in whole cell lysates do not change following ectopic wild-type or enzyme-dead mutant Rab6A expression. (I-K) ELISA of LPA concentrations in CM samples from the indicated cells (n=4 replicates per condition). (L) Bright field micrographs of cells that invaded through Matrigel-coated filters in Boyden chambers. Scale bar, 200  $\mu$ m. Upper chambers loaded with 393P\_ZEB1 cell-derived CM and *ATX* inhibitor (*ATXi*) or vehicle. (M) WB analysis to confirm target gene depletion following transfection of LPAR1 or LPAR2 siRNAs. Relative densitometric values indicated. Vinculin loading control. (N) Bright field micrographs of siRNA-transfected 393P\_vector cells that invaded through Matrigel-coated filters in Boyden chambers. Scale bar, 200  $\mu$ m. Cells were transfected with LPAR1 or LPAR2 siRNAs. Upper chambers contained 393P\_ZEB1 cell-derived CM.

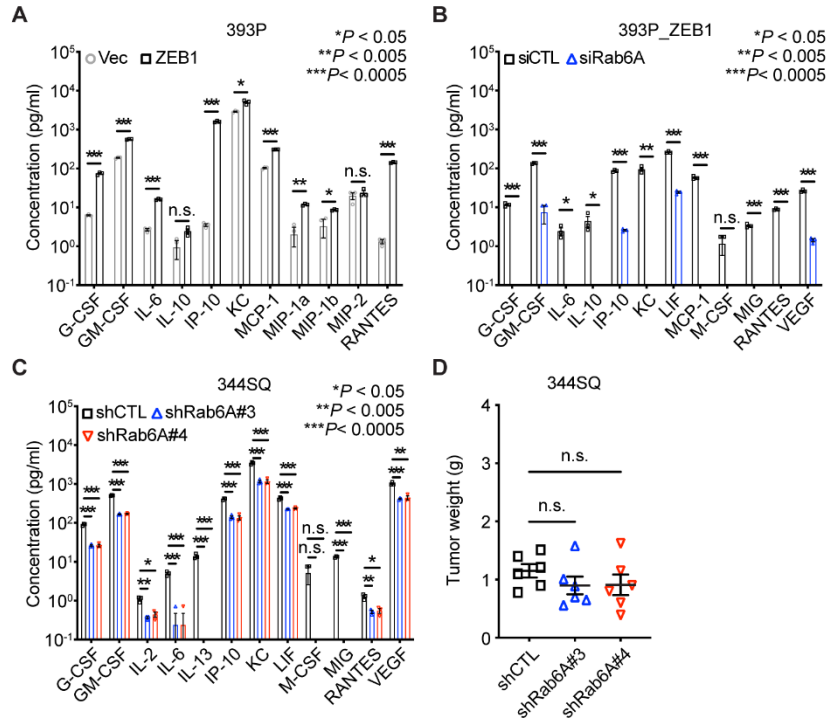

**Fig. S6. ZEB1 activates a Rab6A-dependent secretory process.** (A-C) Multiplexed antibody-based analysis of cytokine concentrations in CM samples from 393P\_vector and 393P\_ZEB1 cells (A), Rab6A-deficient or -replete 393P\_ZEB1 cells (B), or Rab6A-deficient or -replete 344SQ cells (C) (n=triplicate samples per condition). (D) Flank tumor weights in syngeneic, immunocompetent mice (dots) 3 weeks after injection with Rab6A-deficient (shRab6A#3 and #4) or -replete (shCTL) 344SQ cells. Tumors analyzed by flow cytometric analysis (Fig. 4B).

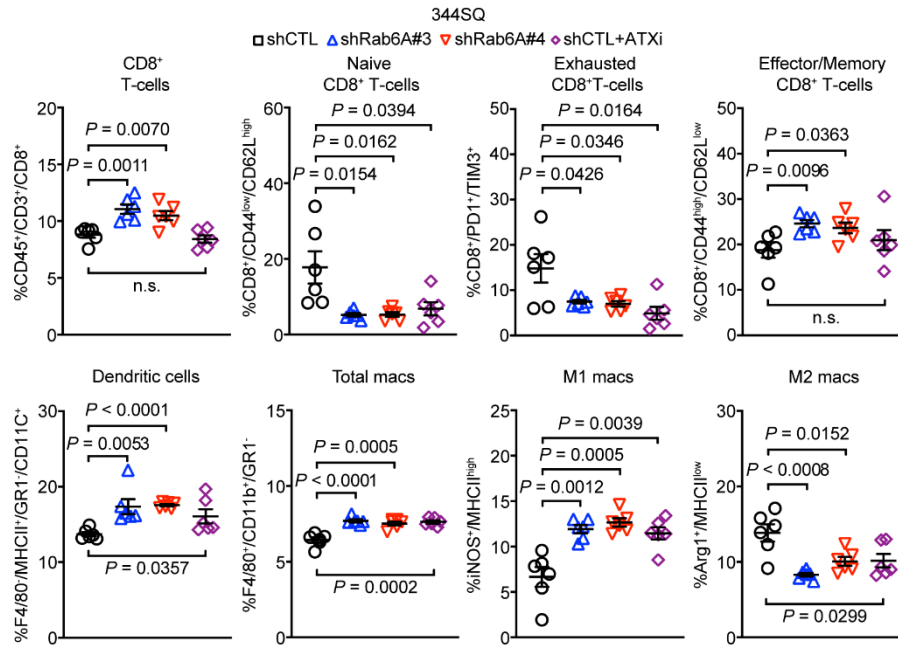

**Fig. S7. ATX inhibition partly recapitulates the effects of Rab6A depletion on CD8<sup>+</sup> T cells and macrophages.** Flow cytometric analysis of murine splenocytes derived from syngeneic, immunocompetent mice that had been co-cultured with Rab6A-replete 344SQ cells in presence or absence of ATX inhibitor ( $n = 6$  replicates of each condition). As a comparison, splenocytes were co-cultured with Rab6A-deficient 344SQ cells. Percentages of T cells (CD8<sup>+</sup> T cells, CD44<sup>high</sup>/CD62L<sup>high</sup> naïve CD8<sup>+</sup> T cells, PD1<sup>+</sup>/TIM3<sup>+</sup> exhausted CD8<sup>+</sup> T cells, CD44<sup>high</sup>/CD62L<sup>low</sup> effector/memory CD8<sup>+</sup> T cells) and antigen-presenting cells (dendritic cells, total macrophages, M1 macrophages, and M2 macrophages) were quantified.

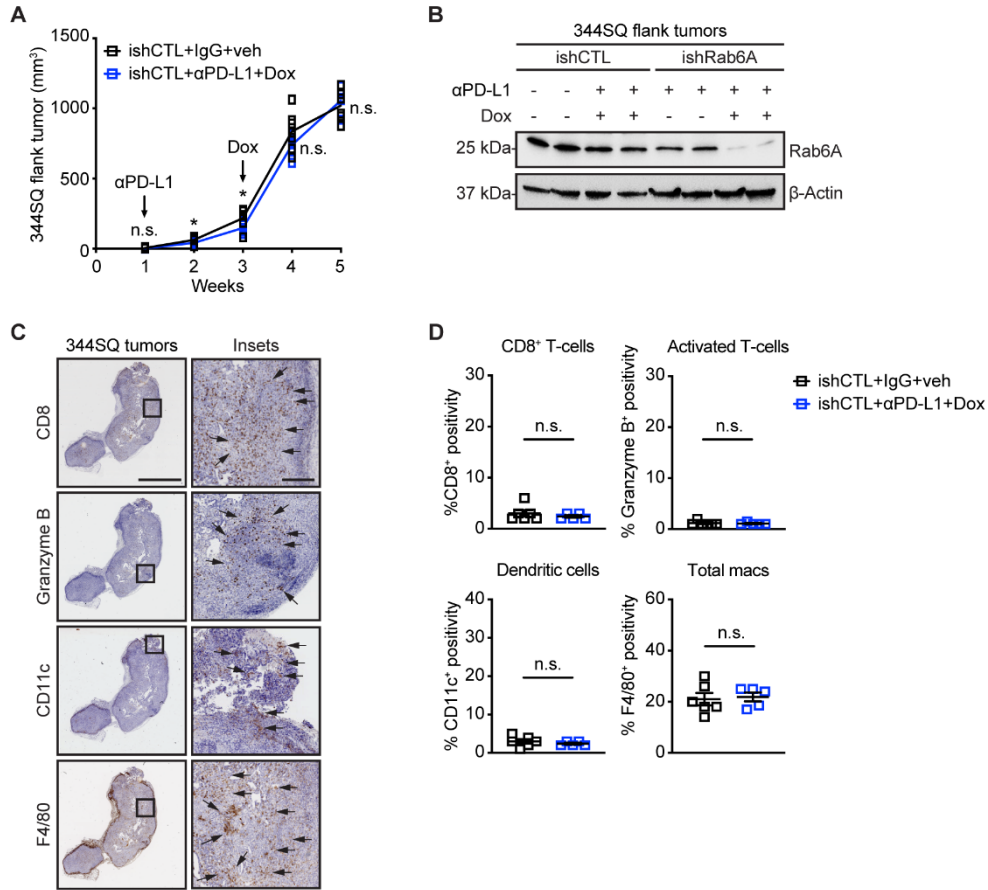

**Fig. S8. LUAD cells acquire resistance to anti-PD-L1 treatment.** (A) Subcutaneous tumor growth curves in syngeneic, immunocompetent mice (dots). Cohorts are color-coded. Mean  $\pm$  SEM. \*\*\*,  $P < 0.0005$ . (B) WB analysis of Rab6A levels in flank tumors generated by 344SQ cells stably transfected with doxycycline (dox)-inducible control (ishCTL) or Rab6A (ishRab6A) shRNAs. Mice were treated with anti-PD-L1 (+) or IgG (-) and doxycycline (+) or vehicle (-).  $\beta$ -Actin loading control. (C) Representative images of tumor sections stained with anti-CD8, -granzyme B, -CD11c, or -F4/80 antibodies. Areas of interest (boxed regions) are illustrated at higher magnification (right column). Positively stained cells (arrows). Scale bars, 3 mm (left), 300  $\mu$ m (insets). (D) The percentages of cells that stained positively in control (ishCTL+IgG+veh) and anti-PD-L1 (ishCTL+anti-PD-L1+Dox) cohorts.

**Table S1. Characteristics of LUAD cell lines.**

| Cell line <sup>a</sup>    | Species | ZEB1 expression | EMT state   | Metastatic potential | References |
|---------------------------|---------|-----------------|-------------|----------------------|------------|
| 307P                      | Mouse   | Low             | Epithelial  | Low                  | (1)        |
| 393P                      | Mouse   | Low             | Epithelial  | Low                  | (1)        |
| 393P_Vec <sup>b</sup>     | Mouse   | Low             | Epithelial  | Low                  | (2)        |
| 393P_ZEB1 <sup>c</sup>    | Mouse   | High, ectopic   | Mesenchymal | Medium               | (2)        |
| 344SQ                     | Mouse   | High            | Mesenchymal | High                 | (1)        |
| 344SQ_shCTL <sup>d</sup>  | Mouse   | High            | Mesenchymal | High                 | (2)        |
| 344SQ_shZEB1 <sup>e</sup> | Mouse   | Low, knockdown  | Epithelial  | Low                  | (2)        |
| H1299                     | Human   | High            | Mesenchymal | High                 | (3)        |

<sup>a</sup>Murine cell lines designated based on mouse number (e.g., 307) and site of derivation, including primary lung tumor (P) or subcutaneous metastasis (SQ)

<sup>b</sup>stably transfected with empty vector

<sup>c</sup>stably transfected with ectopic ZEB1

<sup>d</sup>stably transfected with control shRNA

<sup>e</sup>stably transfected with ZEB1 shRNA

**Table S2. Target Scan predicted miRNA binding sites.**

| miRNA           | Position in the Rab6A<br>3'UTR | Seed match | Context++ score percentile |
|-----------------|--------------------------------|------------|----------------------------|
| mmu-miR-148a-3p | 534-540                        | 7mer-1A    | 92                         |
| mmu-miR-182-3p  | 951-957                        | 7mer-m8    | 89                         |

| miRNA           | Position in the Rab6A<br>3'UTR | Seed match | Context++ score percentile |
|-----------------|--------------------------------|------------|----------------------------|
| hsa-miR-148a-3p | 571-577                        | 7mer-1A    | 92                         |

| miRNA           | Position in the Rab8A<br>3'UTR | Seed match | Context++ score percentile |
|-----------------|--------------------------------|------------|----------------------------|
| mmu-miR-148a-3p | 1193-1198                      | 6mer       |                            |

| miRNA           | Position in the Rab8A<br>3'UTR | Seed match | Context++ score percentile |
|-----------------|--------------------------------|------------|----------------------------|
| hsa-miR-148a-3p | 1291-1296                      | 6mer       |                            |

| miRNA           | Position in the Rgp1<br>3'UTR | Seed match | Context++ score percentile |
|-----------------|-------------------------------|------------|----------------------------|
| mmu-miR-148a-5p | 2951-2958                     | 8mer       | 51                         |
| mmu-miR-182-3p  | 406-413                       | 8mer       | 81                         |
| mmu-miR-182-5p  | 1708-1714                     | 7mer-1A    | 13                         |

| miRNA           | Position in the Rabin8<br>3'UTR | Seed match | Context++ score percentile |
|-----------------|---------------------------------|------------|----------------------------|
| mmu-miR-148a-3p | 614-620                         | 7mer-1A    | 77                         |

**Table S3. List of qPCR primers.**

| Gene         | Forward (5'-3')          | Reverse (5'-3')         |
|--------------|--------------------------|-------------------------|
| Mouse Rab1A  | GTCCAGCATGAATCCCGAATA    | ATCTGCAAACCTAAGGAGAAGG  |
| Mouse Rab2A  | GCAGGAGTCCTTTTCGTTCTATC  | GTTGAACGTGTCTCTCCTTGT   |
| Mouse Rab5A  | GGTCCCTTCATATGAGCTTCTT   | CTGTTCCAGACACACCTCTATG  |
| Mouse Rab6A  | CTTCCCTGTTCTTCCCTTTCTC   | TAGCCTGGAGCTGTCTGTAA    |
| Human Rab6A  | CACAGGACAGAAGCAGAGAAG    | CATGGGAGATTAGCAGGAACAG  |
| Mouse Rab7   | CCTACTCAAAGAGGAAAGGAGAAC | GCTAACCTACAGGTACCACAAC  |
| Mouse Rab8A  | GCTCGATGGCAAGAGGATTA     | CTGTAGTAGGCTGTCGTGATTG  |
| Human Rab8A  | CTGTACTCACAGCCAAGATCAC   | GAGGATTCTGGATGCTTCTGTC  |
| Mouse Rab11A | TGTAGAGCGATGGCTGAAAG     | CTGCCCTGAGATGACGTAAT    |
| Mouse Rab14  | AACTGCACCGTACAACACTC     | TGTGAGGACAATCAGCCATAAA  |
| Mouse Rab23  | TCTCGGCCTAAGAAGGAGATAG   | GTCACCTTGAGTGGAGAAGAAA  |
| Mouse Rab25  | CCTGCCTTCAGCTTTCAGATA    | GATCACATGGTAGGGCATGAT   |
| Mouse Rab37  | CAGAGGTCAGAGCCAGATAAAG   | AAAGAGAGAGAGGGAGAGAGAG  |
| Mouse Rab40B | CAAGCTCAAGGCCCATCTAA     | GTCTGGAAAGGTCTCTGTCTTC  |
| Mouse Rgp1   | GAACTCACCCATCACCTTACTC   | GTCCTTCTTCCCCTGTCATC    |
| Human Rgp1   | ATTGAGAGCATGGGCTGTAG     | GGCTCAGAGAGGTGAAGTAATC  |
| Mouse Rabin8 | CTCCTTCCTGTCTGTGTGTATG   | CGCGCACTGTTCTTCATTTATT  |
| Human Rabin8 | CAGGATGACGACTTGATGTAGAA  | AGGGAGTAGGATCAGGAAGATAA |
| Mouse Mmp14  | CATCATTGAGGTGGATGAGGAG   | CCATGGCGTCTGAAGAAGAA    |
| Human MMP14  | GACTGTCAGGAATGAGGATCTG   | CGTGTCCATCCACTGGTAAA    |
| Mouse Atx    | GTCCTCTCTCTGTGTCTTCTTTC  | CATGAGTTCCTCTACCCACTTC  |
| Human ATX    | GGGCTGCACTTGTGATGATA     | GAGGAGGTGTCTCTCTTCTGTA  |

## References

1. D. L. Gibbons *et al.*, Contextual extracellular cues promote tumor cell EMT and metastasis by regulating miR-200 family expression. *Genes Dev* **23**, 2140-2151 (2009).
2. X. Tan *et al.*, Epithelial-to-mesenchymal transition drives a pro-metastatic Golgi compaction process through scaffolding protein PAQR11. *J Clin Invest* **127**, 117-131 (2017).
3. Y. H. Ahn *et al.*, ZEB1 drives prometastatic actin cytoskeletal remodeling by downregulating miR-34a expression. *J Clin Invest* **122**, 3170-3183 (2012).
